1           **Social structure defines spatial transmission of African swine fever in wild boar**

2                           Kim M. Pepin<sup>1,\*</sup>, Andrew Golnar<sup>1</sup>, and Tomasz Podgórski<sup>2,3</sup>

3    1.       National Wildlife Research Center, USDA, APHIS, Wildlife Services, 4101 Laporte  
4    Ave., Fort Collins, CO, 80526.

5    2.       Mammal Research Institute, Polish Academy of Sciences, Stoczek 1, 17-230 Białowieża,  
6    Poland

7    3.       Department of Game Management and Wildlife Biology, Faculty of Forestry and Wood  
8    Sciences, Czech University of Life Sciences, Kamýcká 129, 165 00 Praha 6, Czech Republic

9  
10   \*Corresponding author: Kim Pepin, National Wildlife Research Center, United States

11   Department of Agriculture, 4101 Laporte Ave., Fort Collins, CO, 80526;

12   [kim.m.pepin@aphis.usda.gov](mailto:kim.m.pepin@aphis.usda.gov)

13

14   RH: Pepin et al. "Spatial spread of African swine fever in wild boar

15   Author E-mails:

16   Kim Pepin: [kim.m.pepin@aphis.usda.gov](mailto:kim.m.pepin@aphis.usda.gov)

17   [Tomasz Podgórski:t\\_podgorski@ibs.bialowieza.pl](mailto:Tomasz.Podgorski@ibs.bialowieza.pl)

18

19   **Abstract**

20    1. African swine fever virus (ASFv) is endemic in wild boar in Eastern Europe, challenging  
21       elimination in domestic swine. Estimates of the distances between transmission events  
22       are crucial for predicting rates of disease spread to guide allocation of surveillance and

23 control resources. Transmission distances are mainly defined by spatial and social  
24 processes in hosts, but effects of these processes on spread are poorly understood, and  
25 inferences often include only one process.

- 26 2. To understand effects of spatial and social processes on disease dynamics we developed  
27 spatially-explicit transmission models with different assumptions about social and/or  
28 spatial contact processes. We fit the models to ASFv surveillance data from Eastern  
29 Poland from 2014-2015 and evaluated how inclusion of social structure affected  
30 inference.
- 31 3. The model that accounted for social along with spatial processes provided better  
32 inference of spatial spread and predicted that ~80% of transmission events are within the  
33 same family group.
- 34 4. The models predicted dramatically different effective reproductive numbers, both in  
35 magnitude and variation.
- 36 5. Specifying contact structure with spatial but not social processes can lead to very  
37 different disease dynamics and inference of epidemiological parameters. Uncertainty in  
38 these processes should be accounted for in predicting spatial spread in social species.

39

40 **KEYWORDS:** African swine fever, Effective reproduction number, Spatial transmission kernel,  
41 Surveillance, Wild boar,

42

## 43 **INTRODUCTION**

44 Spatial transmission kernels (STKs) are probability distribution functions of transmission  
45 distance between sequential cases of infection. They describe the variation and limits of spatial

46 disease spread per transmission event and inform how surveillance, containment, or mitigation  
47 strategies should be deployed [1]. For example, information on where cases may arise can inform  
48 what spatial radius should be used for ring culling, ring vaccination, spatial quarantine or  
49 intensive surveillance [2]. Without detailed genetic data or contact tracing data to reconstruct  
50 transmission history, STKs are predominantly estimated indirectly by fitting disease transmission  
51 models to available case data [1-3] providing valuable insight for developing intervention  
52 strategies [4-7]. However, models often make simplifying assumptions based on the available  
53 information that could have negative impacts on policy decisions if the models are not robust to  
54 violation of these assumptions. Common assumptions in models for estimating STKs include  
55 assuming a single introduction event and assuming observation of all transmission events [8].  
56 Methods that account for these processes are important for providing more realistic predictions  
57 of spatial spread in systems where these assumptions are violated.

58 Another common issue is that the potential scope of contact heterogeneities is often  
59 simplified or lacking, such that uncertainty in model specification cannot be considered despite  
60 its potential importance [9]. In non-vector-borne disease systems, key drivers of contact  
61 heterogeneities include social [10] and spatial processes [2], yet our understanding of the relative  
62 role of these processes in driving spatial disease dynamics is weak in most systems [11, 12] and  
63 analyses that consider contact heterogeneities tend to focus on one or the other. Understanding  
64 the potential effects of these different elements of contact heterogeneity on inference of disease  
65 dynamics will provide insight on the appropriate scope of model uncertainty that should be  
66 considered in practical applications.

67 African swine fever virus (ASFv), a virulent virus of swine, emerged in domestic swine  
68 in Georgia in 2007 following a single introduction event from Africa [13]. After its initial

69 emergence, the virus spread quickly to Eastern Europe becoming endemic in wild boar, which  
70 has challenged elimination. With no effective vaccine or treatment options, control strategies are  
71 focused on reducing swine movement, decontamination, and culling [14]. Effectiveness of these  
72 strategies depends on being able to rapidly find new cases and target high-risk areas, thus models  
73 that can predict spatial spread are crucial tools. However, it has become clear that modeling  
74 efforts need to include realistic ecological details to improve predictions of spatial spread and our  
75 understanding of factors that drive it [15]. Wild boar have limited spatial movement and cluster  
76 into family groups suggesting that both social and spatial processes likely need to be considered  
77 for estimating STKs and thus spatial spread [16-18]. Also surveillance is mostly passive with  
78 only a small proportion of cases likely being observed, and genetic [19] and other analyses [16]  
79 suggest that re-introductions are common. Thus estimates of STKs that account for these realities  
80 are likely important for providing more accurate guidance for disease control policies.

81 In previous work we used ASFv surveillance data from wild boar in Poland during 2014-  
82 2015 to estimate the frequency of carcass-based transmission and re-introduction in outbreak  
83 dynamics while accounting for partially observed data [16]. Here, we extended the modeling  
84 approach to three different assumptions about the form of spatial transmission processes: 1)  
85 neighborhood (local transmission only), 2) exponential decay (distance distribution that includes  
86 long-distance processes), and 3) distance distribution with social structure (Fig. 1). We then  
87 predicted the STKs under each set of assumptions using the fitted models and evaluated the  
88 effects of spatial and social processes on STKs and a key epidemiological parameter – the  
89 effective reproduction number. Our results show striking differences in disease dynamics when  
90 social structure modifies spatially-determined contact heterogeneities, showing that both

91 processes need to be considered for accurate predictions of spatial spread in socially-structured  
92 species.

93

## 94 **METHODS**

### 95 **Surveillance data and study site**

96 The index case of ASFv in wild boar was detected in February 2014 in the north-eastern  
97 part of the country (53°19'33"N, 23°45'31"E), less than 1 km from the border with Belarus.  
98 Subsequent cases occurred close to the Belarusian border [20, 21]. By the end of 2015, 139 wild  
99 boar tested positive for ASFv in the area, with maximum distance of 27.4km west of the border  
100 and a 100km range along the border. The affected area is dominated by a mosaic of woodlands  
101 and agricultural land (crop fields, pastures, meadows) with several large (several hundred square  
102 kilometers), continuous forests. On average, forest covers 53% of the area. In 2014, average wild  
103 boar densities were estimated at 1.5 - 2.5 boar/km<sup>2</sup>, locally ranging from 0.5-1 boar /km<sup>2</sup> to 3-5  
104 boar/km<sup>2</sup> (Regional Directorate of State Forests, Białystok, Poland). ASFv surveillance used a  
105 combination of active and passive mechanisms, with samples being obtained through hunter  
106 recovery (active) or reports of road kills or carcasses found on the landscape opportunistically  
107 (passive). A total of 4625 samples were from hunters, while 271 were from road kill or non-road  
108 kill carcasses. Samples, collected by veterinary services and hunters, were submitted to the  
109 National Reference Laboratory for ASFv at the National Veterinary Research Institute in  
110 Puławy, Poland. Detailed description of laboratory procedures and tests can be found in  
111 Woźniakowski et al. 2015 and Śmietanka et al. 2016. We used surveillance data from the area of  
112 8 administrative districts where ASFv occurred during 2014-2015 ('infected zone', 2224 samples  
113 tested) to fit the model and define spatio-temporal intensity of sampling in our model.

114

## 115 **Process model**

116 We used a spatially-explicit, individual-based modeling framework fitted to the ASFv  
117 surveillance data using Approximate Bayesian Computation (ABC) as in Pepin et al. 2020. We  
118 evaluated three models that differed by social and spatial transmission process assumptions  
119 (described below) in host populations that were structured by family groups and dispersal as  
120 defined by field data (Fig. 1). We estimated transmission parameters and some other  
121 epidemiological and demographic parameters as described below. With parameters from the  
122 fitted models we then predicted cases over time, spatial spread over time, spatial transmission  
123 kernels, effective reproductive numbers over time, and age- and sex-structure of infected  
124 individuals. All analyses were implemented in Matlab (Version R2016b, The MathWorks, Inc.,  
125 Natick, Massachusetts, United States). A full description of the individual-based model is given  
126 in Pepin et al. (2020). Below is an overview of the approach with emphasis on differences from  
127 our previous work.

128 We used a 5 x 5 km (25 km<sup>2</sup>) gridded landscape to map spatial movement. The total  
129 landscape size was 120 x 50 km (6000 km<sup>2</sup>), similar to the ‘infected’ zone. Grid cells each had a  
130 carrying capacity of 0.5 or 2 boars/km<sup>2</sup>, which controlled heterogeneity in population density  
131 across the landscape through density-dependent reproduction. In previous work we found that  
132 this level of heterogeneous boar density fit the surveillance data better than homogenous  
133 densities of 1, 2 or 4 wild boar / km<sup>2</sup> [16].

134 Individual-boar attributes were monitored and updated at a daily time step. These  
135 included age, unique group identification, X and Y coordinates of the home range centroid, grid-  
136 cell ID; and status of life, reproduction, disease. Thus, the distribution of wild boar locations was

137 continuous but density was controlled at the grid cell level. The variable attributes changed based  
138 on time, age, group size, grid-cell density, natal dispersal timing, and the disease transmission  
139 process. Attributes that were fixed at birth included sex, dispersal distance, dispersal age, and age  
140 at natural death. Thus, natal dispersal age and distance, and natural death, occurred at pre-set  
141 ages and distance (for dispersal).

142 Individual-boar status was updated by the following order of processes: daily movement  
143 (defined by the contact processes described below) and disease transmission, natural mortality  
144 (occurring according to the pre-set age), natal dispersal (occurring according to the pre-set age),  
145 dispersal due to other factors (i.e., family groups becoming too large, single females searching  
146 for groups; occurring based on current family group size), surveillance sampling (permanent  
147 removal of individuals from the landscape), conception (rates dependent on current grid cell  
148 density), and new births (occurring with gestating females reach the end of their gestation  
149 period). Fixed parameters included longevity (a data-based distribution), litter size (6), age at  
150 reproductive maturity (180 days), minimum time between conception and farrowing (90 days),  
151 gestation time (115 days), age of natal dispersal (~Poisson(13 months) truncated between 10-24  
152 months), dispersal distance (~Weibull(2.5,0.5)), maximum size of family groups (10), incubation  
153 period for ASFv (~Poisson(4 days) truncated at 1), infectious period for ASFv (~Poisson(5 days)  
154 truncated at 1), and disease-induced mortality (100%). There were also fixed seasonal trends that  
155 varied monthly for conception probability and carcass persistence that were based on data [22-  
156 25]. Rationale and sources for these parameters are derived from ecological studies of wild boar  
157 and are described in Pepin et al. 2020.

158 Based on the attributes and processes described above, epidemiological states for  
159 individual boar included: susceptible, exposed, infectious, infectious carcass, uninfected

160 carcass, and removed from the landscape. Mortality only occurred from the disease (leading to  
161 an infectious carcass) or reaching the age of longevity (leading to an uninfected carcass). The  
162 hunting process of alive individuals caused direct removal from the landscape (no carcass). Our  
163 model also included multiple spatio-temporal scales of spatial processes because the dispersal  
164 process ( $\sim$ Weibull(2.5,0.5) allowed for longer-distance movements and occurred less frequently  
165 relative to the contact process that occurred daily and mostly at shorter distances.

166 We compared three different forms of contact structure: 1) neighborhood (local  
167 transmission only), 2) exponential decay (distance distribution that includes long-distance  
168 processes), and 3) distance distribution with social structure (Fig. 1). Forms 1 and 2 are common  
169 ways of considering contact in space at population-level scales [26], whereas 3 incorporates  
170 heterogeneity due to social groups. For 1, infectious individuals could transmit to all susceptible  
171 individuals within a fixed radius with equal probability. The radius of the local neighborhood  
172 was constant across individuals and time – thus similar to a queen’s neighbor effect (Eq. 1). For  
173 2, infectious individuals could transmit to all susceptible individuals on the landscape, but the  
174 probability of transmission decayed with distance (Eq. 2). Model structure 3 was the same as 2,  
175 except that transmission rates varied due to both group membership and space - individuals in  
176 the same family group had higher transmission rates with each other relative to those among  
177 family groups (Eq. 3). In general the daily force of infection ( $\lambda$ ) for each contact structure was  
178 defined as follows:



179

$$180 \quad \lambda = \sum_{k=1}^K \sum_{j=1}^J I_{k,d} \begin{cases} S_j \beta_d, & x_{k,j} < \zeta \\ 0, & \text{otherwise} \end{cases} + \sum_{k=1}^K \sum_{j=1}^J I_{k,c} \begin{cases} S_j \beta_c, & x_{k,j} < \zeta \\ 0, & \text{otherwise} \end{cases} + \beta_{0,\{j\}} \quad (1)$$

$$182 \quad \lambda = \sum_{k=1}^K \sum_{j=1}^J I_{k,d} S_j \beta_d e^{-\alpha x_{k,j}} + \sum_{k=1}^K \sum_{j=1}^J I_{k,c} S_j \beta_c e^{-\alpha x_{k,j}} + \beta_{0,\{j\}} \quad (2)$$

$$181 \quad \lambda = \sum_{k=1}^K \sum_{j=1}^J I_{k,d} (S_j \beta_d e^{-\alpha x_{k,j}} + S_{j,w} \beta_{w,d}) + \sum_{k=1}^K \sum_{j=1}^J I_{k,c} (S_j \beta_c e^{-\alpha x_{k,j}} + S_{j,w} \beta_{w,c}) + \beta_{0,\{S_j\}} \quad (3)$$

183

184 Where  $\zeta$  is a fixed local neighborhood (Eq. 1) delimiting the contact radius,  $x_{i,j}$  is the distance  
 185 between infectious individual  $k$  ( $I_k$ ) and susceptible individual  $j$  ( $S_j$ ),  $\alpha$  is the rate at which  
 186 transmission decays with distance (Eq. 2 and 3),  $d$  denotes alive individuals or direct  
 187 transmission,  $c$  denotes infectious carcasses or carcass-based transmission,  $\beta$  is the transmission  
 188 rate that is specific to the transmission mechanism ( $d$  or  $c$ ),  $\beta_{0,\{j\}}$  is the baseline rate at which re-  
 189 introduction occurs to susceptible individuals near the Eastern border ( $\{S_j\}$ ), and family group  
 190 structure ( $w$  denotes contacts within the same family group, absence of  $w$  denotes among family  
 191 groups; Eq. 3).

192

### 193 **Observation model**

194 Because surveillance sampling was small compared to the full population it was  
 195 important to calibrate the process model with an observation model. Thus, we sampled the true  
 196 disease dynamics according to the surveillance process that was used in Poland, i.e., alive  
 197 individuals were available to be harvested by hunters, and carcasses were available to be found  
 198 for carcass sampling. As negative samples could not be georeferenced to the grid cell level (they  
 199 were only available at the district level), we were not able to account for the spatial distribution

200 of sampling accurately. However, there were strong temporal trends in the number of samples  
201 collected thus we used those trends to describe sampling heterogeneity. First, we calculated the  
202 relative number of boar sampled by hunters and carcass-sampling from the data (number  
203 sampled on day  $t$ /maximum ever sampled separately for each method) to produce seasonal trends  
204 in the proportion of the population sampled. Then we multiplied the seasonal trend data for each  
205 method by the scaling factors ( $\rho_h$  and  $\rho_c$ ) to determine the daily proportion of boar that would be  
206 sampled (detection probability) by hunter harvesting or dead carcasses across the landscape at  
207 random. We assumed that boar  $< 6$  months of age would not be hunted (typically not targeted by  
208 hunters) and that boar  $< 3$  months of age would not be sampled by the dead carcass method  
209 (because they are unlikely to be found).

210

## 211 **Model fitting and evaluation**

212 Unknown parameters were estimated based on Approximate Bayesian Computation  
213 (ABC) with rejection sampling as described in Pepin et al. 2020. For all models, estimated  
214 parameters included: frequency of introduction at the eastern border ( $\beta_{0,\{j\}}$ ),  $\beta_d$ ,  $\beta_c$ , scaling  
215 parameters on seasonal trends of hunted hosts ( $\rho_h$ ) and carcass sampling ( $\rho_c$ ), a scaling parameter  
216 on seasonal trends in the length of carcass persistence on the landscape ( $\pi$ ), and a scaling  
217 parameter on seasonal patterns of host birth probabilities ( $\theta$ ). In addition, we estimated spatial  
218 parameters that describe three different contact structures: 1)  $\xi$  (nearest-neighbor), 2)  $\alpha$  (the  
219 decay of contact probability with distance, and 3)  $\beta_{w,d}$  and  $\beta_{w,c}$  (direct and carcass-based  
220 transmission rates for within-group contacts). Prior distributions are listed in Table S1 (with  
221 restrictions:  $\beta_d > \beta_c$ ,  $\beta_{w,d} > \beta_d$ ,  $\beta_{w,c} > \beta_c$ ) and were informed by movement and contact data [17, 18,  
222 27, 28].

223 To sample across parameter space efficiently we used a Latin hypercube algorithm to  
224 generate 979,592 parameter sets and then ran the model twice on each parameter set (for a total  
225 of 1,959,184 iterations; or 2 chains of 979,592).  $\beta_d$ ,  $\beta_c$ , and  $\rho_c$  were sampled on a log scale. A  
226 two-tiered approach was applied for evaluating parameter sets to improve efficiency. Simulations  
227 were terminated early if they were unrealistic, specifically: 1) when landscape-wide host density  
228 < 20% of the initial density, 2) > 150 new cases per day; 3) no new cases sampled for 6 months,  
229 or 4) > 300 total cases (more than double the actual number). We then only considered parameter  
230 sets for which the simulation reached the end of the two-year time frame. The posterior  
231 distributions consisted of all unique parameter sets (considering both chains) that were within the  
232 absolute distance of three metrics: the sum of absolute differences between observed and  
233 simulated surveillance data for monthly cases from live and dead animals (considered  
234 separately), and the maximum monthly Euclidian distance of cases from the eastern border.  
235 Distance metric tolerance values were 48 for monthly cases from carcasses, 24 for monthly cases  
236 from hunter-harvest samples, and 120 for maximum distance from the border. This allowed  
237 average error rates of 2 (carcass) and 1 (hunter harvest) cases, and 5 km from the border per  
238 month on average. These error rates represent levels of uncertainty that we expected from the  
239 data sources in our system, sensitivity analyses revealed that less stringent error rates would  
240 affect the posterior distribution estimates (data not shown), and more stringent error rates would  
241 require restrictively large computational resources unless prior distributions are more informed.

242 Average distance metrics for parameter sets from the posterior distribution were used to  
243 evaluate goodness of fit along with  $R^2$  values (squared correlation of observed and predicted case  
244 and spatial distance trajectories, Table S1) and mean absolute error (MAE, Fig. 2). For each  
245 fitted model we predicted outbreak dynamics using 1000 random samples from the posterior

246 distribution. The average of the 1000 predictions was used to calculate  $R^2$  and MAE. We also  
247 tested the ability of our models to forecast ASF dynamics by using the parameters estimated  
248 from fits to the 2014-2015 data to predict the first 7 months of 2016 (Jan.-Jul.). We predicted  
249 underlying spatial transmission kernels, effective reproductive number over time, and age-sex  
250 structure of cases by simulating from the fitted models.

251

## 252 **RESULTS**

### 253 **Parameter inference and model fit**

254 The model with both social and spatial processes (Model 3) qualitatively captured spatial  
255 spread better than Models 1 (Local neighborhood only) and 2 (Distance distribution only), and  
256 Model 1 largely overestimated cases during the largest peak (Fig. 2). Also, the posterior  
257 distribution of transmission probabilities were much lower and more realistic for Models 2 and 3  
258 relative to Model 1 (see  $\beta_d$  and  $\beta_c$  in Table S1). The inferred STK for each model revealed two  
259 distinct peaks symbolic of within- and between-group transmission (Fig. 3), but predicted  
260 different amounts of within group transmission when within and between-group transmission  
261 probabilities were allowed to vary (Model 3). Model 3 predicted the highest proportion of within  
262 group transmission (0.8), followed by model 2 (0.6) and model 1 (0.3) (Fig. 3). For both Models  
263 2 and 3, between-group transmission peaked between 0.5 km and 1 km, with a peak proportion  
264 of transmission events reaching 0.05 and 0.02 for Model 2 and Model 3, respectively (Fig. 3).  
265 For Model 1, between-group transmission events plateaued between 1-1.5 km at a frequency of  
266 0.2 before dropping rapidly to a frequency of 0 around 1.5km (Fig. 3). The realized STKs for  
267 Models 2 and 3 had long tails that indicated a low frequency of long-distance pathogen dispersal  
268 (Fig. 3).

269

## 270 **Impacts of model structure on epidemiological processes**

271         The specification of spatial and social transmission processes in the model structure  
272 resulted in different inference of  $R_e$ . Model 1 (mean: 2.5 with 95% confidence interval: [1.8,  
273 3.2]) predicted higher average  $R_e$  over time, followed by Model 3 (1.5 [1.1-2.0]), and then Model  
274 2 (1.1 [1.0-1.3]), including both direct and carcass-based transmission (Fig. 4). However,  
275 predictions from Model 2 suggest  $R_e$  is relatively homogenous over time, while Models 1 and 3  
276 predicted much more variability, with  $R_e$  values reaching above a value of 4 on multiple  
277 occasions, and above a value of 8 at least once (Fig. 4). Model 3 predicted higher  $R_e$  during  
278 annual birth pulses (Fig. 4). Models 1 and 2 predicted lower contributions of carcass-based  
279 transmission in overall  $R_e$  whereas Model 3 predicted more similar levels of each transmission  
280 mechanism (with carcass-based transmission being slightly lower on average). All models  
281 predicted that the infected class is predominantly composed by juveniles (<6 months of age; Fig.  
282 S1-S3), reflecting the age-structure in the population. However, Models 1 and 2 predicted a  
283 slight male-bias in infected individuals while Model 3 predicted a slight female bias (Fig. S1-  
284 S3).

285

## 286 **DISCUSSION**

287         Understanding how infectious diseases spread in space and time is key for developing  
288 effective surveillance and intervention strategies [6]. Statistical inference of wildlife disease  
289 systems is often challenged by partially observed data, multiple pathogen introductions, and a  
290 limited understanding of host contact processes, all of which create uncertainty in our ability to  
291 characterize patterns of infectious disease spread. Here we demonstrate an approach for

292 estimating patterns of ASFv spread that accounts for these complexities while evaluating how  
293 different assumptions about contact structure influence the inference of spatial disease dynamics.  
294 Results show that both spatial and social sources of contact heterogeneity are important for  
295 capturing the spatial dynamics of ASFv in wild boar of Eastern Poland, and that not accounting  
296 for both processes can lead to very different inferences of a key epidemiological quantity,  $R_e$ .

297 Our results highlight the importance of considering both spatial and social processes in  
298 estimating STKs. There are numerous approaches for modeling contact heterogeneities due to  
299 spatial [2, 26, 29, 30] and social processes [10]. Network models are a useful approach for  
300 accounting for contact heterogeneity but these are often focused only on heterogeneities due to  
301 social structure [10], while neglecting spatial processes. Including both of these processes in a  
302 single network makes it difficult to disentangle the role of each process, which can be important  
303 for designing optimal control strategies. On the flip side, the field of movement ecology has  
304 developed new strategies for accounting for heterogeneities due to animal movement [11, 12],  
305 but these methods remain underdeveloped for application in disease ecology, and also have not  
306 been used to disentangle spatial and social processes. In order to provide practical inference for  
307 control of important animal diseases it will be important to develop methods that can account for  
308 heterogeneities due to both social and spatial processes, in a manner that the role of each process  
309 can be inferred. This will allow control to be targeted to the appropriate process while improving  
310 predictions of spatial spread for optimizing risk-based surveillance and control.

311 Our models suggested that between 30-80% of transmission events were within the same  
312 family group and almost all transmission events were within 1.5 km, with some rare events at  
313 longer distances. STK estimates can be used to establish control and surveillance zones. For  
314 example, depopulation efforts could be intensified (or abandoned to allow natural fade out)

315 within 1.5 km where most transmission is occurring, with surveillance intensified out to further  
316 distances (i.e., the tail of the STK) to capture the rare long-distance spreading events. A useful  
317 approach could be to employ an adaptive radius that focuses intervention efforts within 99% (or  
318 more – this should be validated with modeling) of the STK, but adapts surveillance based on  
319 real-time surveillance. However, the precise recommendations will depend on how soon a  
320 detection is made relative to where the infection front is currently. With ASFv travelling at 1-2  
321 km per month [18], the radii for high-intensity culling and surveillance would need to be  
322 increased by 1-2 km for each month that detection has lagged behind the infection front,  
323 highlighting the importance of accurate predictions of spatial spread. A longer lag time for  
324 detection will also amplify challenges that arise from long-distance jumps highlighting that this  
325 process is especially important to understand.

326 Long-distance jumps were observed on multiple occasions in Poland after 2015 [19] and are  
327 thought to be due to human-mediated activities, [31, 32]. Thus, developing estimates of STKs  
328 that account for mechanisms of long-distance dispersal will be important for appropriately  
329 targeting disease control going forward. Our approach allowed for some long-distance events but  
330 we assumed a monotonic functional form for contact distances, such that we did not infer the  
331 effects of spatial contact processes occurring on multiple spatial scales. In order to infer spatial  
332 spread with later surveillance data (i.e., 2016-present when longer-distance events occurred  
333 multiple times), it will be important to incorporate other spatial mechanisms in the inference of  
334 the STK, perhaps using covariate data that can inform these long-distance processes. Such an  
335 approach would provide refined recommendations for surveillance and control targets at longer  
336 distances.

337 Our estimates of  $R_e$  (ranging from 1.1-2.5 on average across models) were similar to an  
338 estimate of  $R_0$  of ASFv in wild boar (1.13-3.77) in Russia [33]. However, although our estimates  
339 were similar in magnitude, they revealed substantial temporal variation in  $R_e$  that could impact  
340 policy decisions. For example, all models estimated higher  $R_e$  during seasonal birth pulses  
341 indicating that at this time of year we may expect to see higher rates of spatial spread.  
342 Additionally, estimates of the  $R_e$  over time suggested a different role for carcass-based  
343 transmission in driving ASF transmission, with Models 1 and 2 suggesting that carcass-based  
344 transmission is lower than direct transmission while Model 3 suggested that the two types of  
345 transmission occurred at similar frequencies.

346 In addition to differences in  $R_e$ , the different contact structures predict differences in the role  
347 of sex in transmission over time. Model 3 predicted a slight female bias because this model  
348 predicted that 80% of transmission events occurred within family groups, which are female-  
349 biased. In contrast, Models 1 and 2 predicted a slight male bias because they predicted more  
350 between-group transmission and with a 50:50 sex ratio there are more independent males relative  
351 to family groups. Although it is known that males will travel longer distances than females [34],  
352 especially during mating season to seek out females, we did not account for this temporal  
353 heterogeneity in dispersal. Considering these types of movement heterogeneities in future work  
354 could be important for improving our understanding of which sex might present a higher risk of  
355 ASFv transmission and persistence.

356 Considered separately, spatial and social processes can have similar impacts on disease  
357 dynamics. For example, social aggregation and spatial structuring can both reduce epidemic  
358 potential by fragmented populations or by restricting the spread of pathogens [10, 35]. However,  
359 our results highlight that spatial and social processes can also have quite different impacts on



360 epidemiological quantities, especially estimates of STKs,  $R_e$ , the frequency of different  
361 transmission mechanisms, and potential risk factors such as sex. Being able to appropriately infer  
362 the role of these quantities is crucial for optimizing disease control strategies. When these  
363 contact heterogeneities are inappropriately accounted for it can bias inference (e.g., [36]) and  
364 potentially misguide policy decisions [9]. Moving forward, the field of disease ecology needs to  
365 develop mainstream methods that account for multiple sources of contact heterogeneities in a  
366 manner that their relative roles can be inferred. This will allow uncertainties in contact processes  
367 to be appropriately evaluated and incorporated into predictions of spatial spread [9] and control  
368 to be targeted to the most important risk factors.

369

### 370 **Acknowledgements**

371 KMP was supported by the United States Department of Agriculture, Animal and Plant Health  
372 Inspection Service's National Feral Swine Damage Management Program. AG was supported by  
373 the United States Department of Agriculture, Animal and Plant Health Inspection Service's  
374 APHIS Science Fellowship. TP was supported by the National Science Centre, Poland (grant  
375 number 2014/15/B/NZ9/01933). We thank M. Łyjak, A. Kowalczyk, K. Śmietanka, and G.  
376 Woźniakowski from Department of Swine Diseases, National Veterinary Research Institute in  
377 Pulawy, Poland, for surveillance data. N. Selva provided valuable information on carcass  
378 persistence time.

379

380

381

382 **Figures**

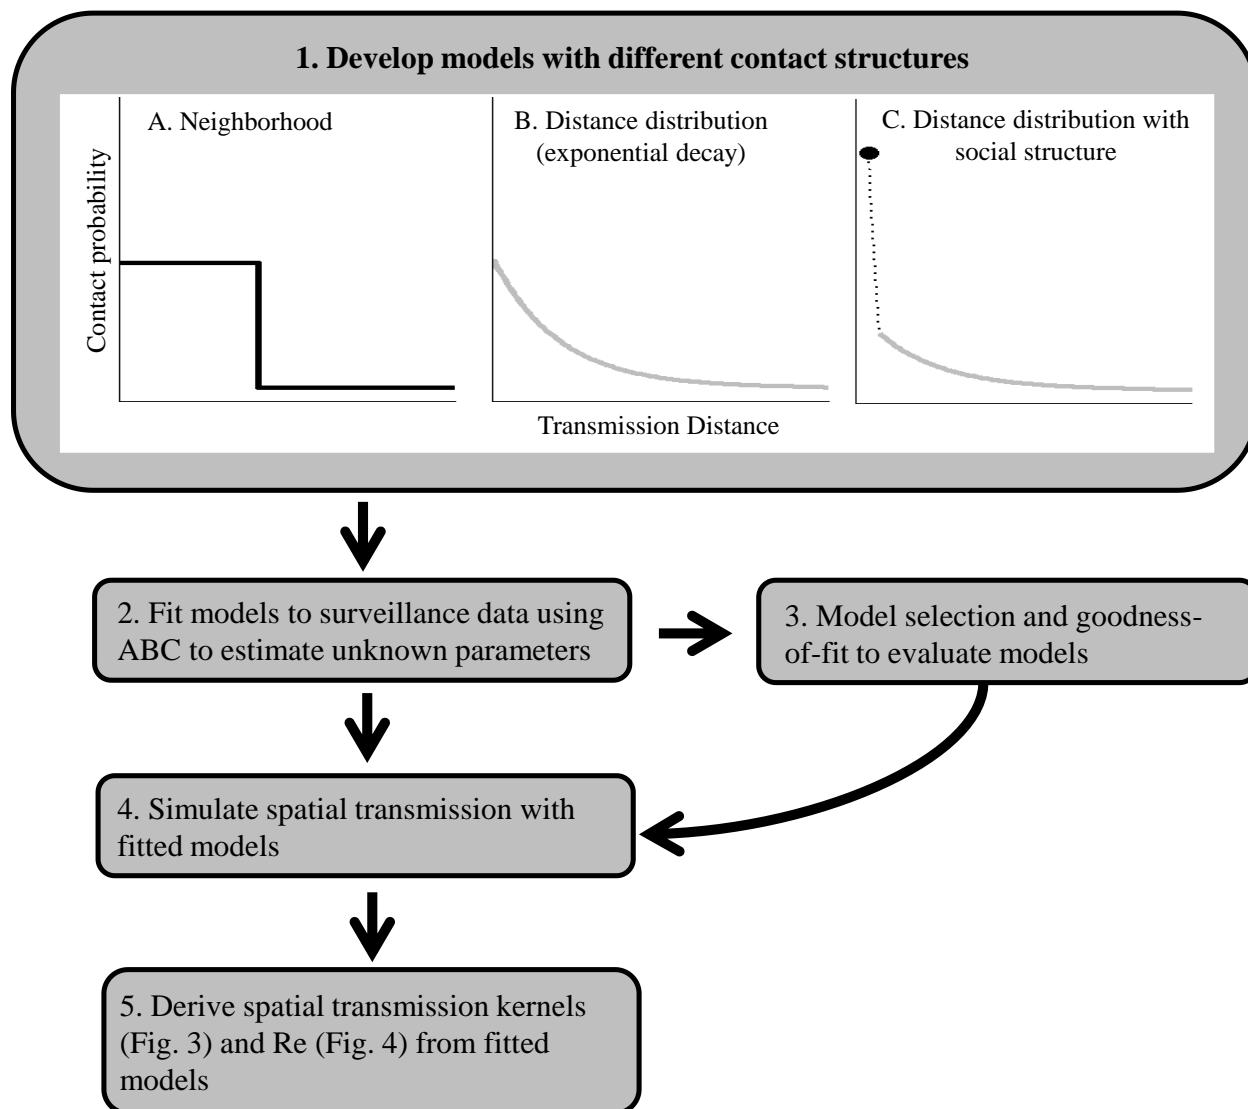

383

384

385 **Fig 1.** Schematic of methods and contact structures.

386

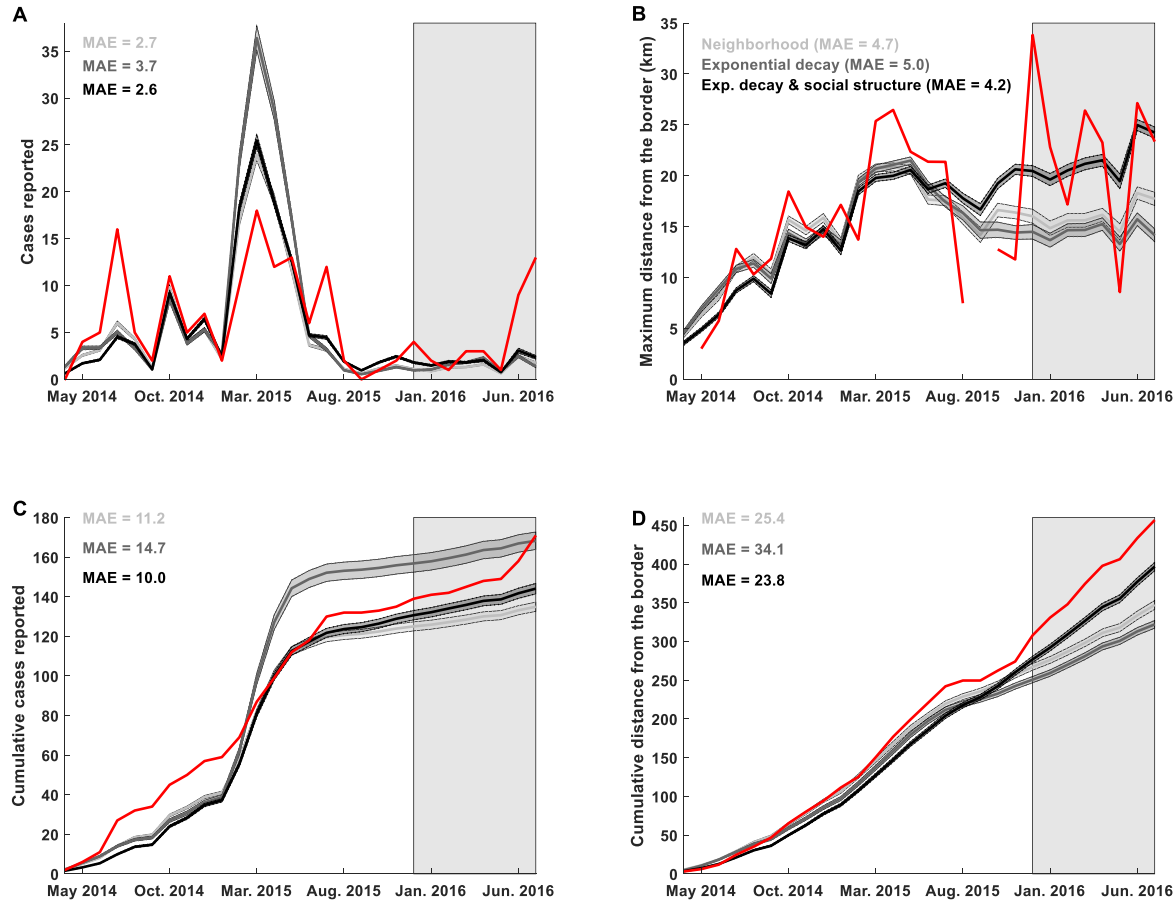

387

388 **Fig. 2.** Model fits to the observed surveillance data (red). Lines are the mean predictions from  
389 1000 simulations with each fitted model (see legend in B for color code). Shading around the  
390 lines areas are 95% prediction intervals of the means. Shading on the right side of plots indicates  
391 the time frame for out-of-sample predictions.

392

393

394

395

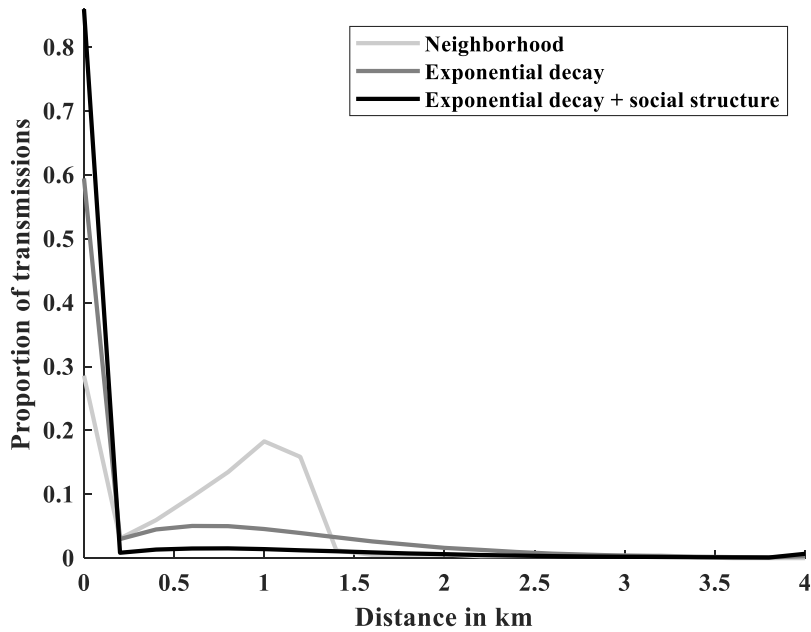

396

397 **Fig. 3.** Realized spatial transmission kernels for each model (see legend). The X-axis is the  
398 distance between home range centroids of infectious and susceptible individuals for which  
399 transmission occurred. Y-axis is the proportion of all transmission events. Lines are the means of  
400 100 simulations using random samples from the posterior distributions of the fitted models.

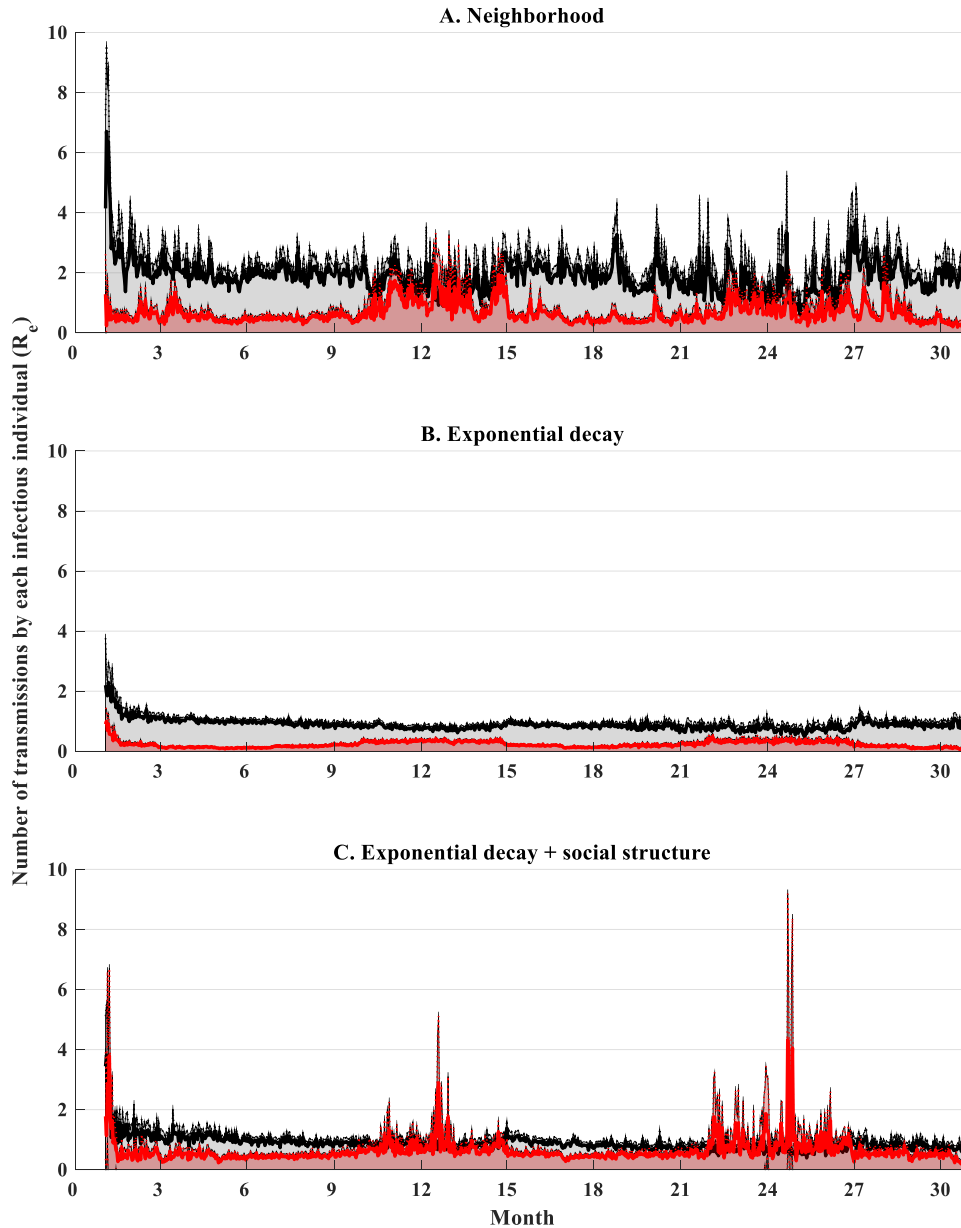

401

402 **Fig. 4.** Effective reproduction number ( $R_e$ ) over time for each model. Effective reproduction  
403 number at a given time point was calculated as the average number of transmissions made  
404 throughout the infectious period for individuals that initially became infectious on day  $t$  (where  $t$   
405 is a day on the X-axis). Dark lines are the means of 100 simulations using random samples from  
406 the posterior distributions of the fitted models; shading indicates 95% prediction intervals of the  
407 means. Overall means with 95% prediction intervals for each model and each transmission

408 mechanism (black: direct, red: carcass-based) were: A) 1.9 [1.4, 2.3], 0.6 [0.4, 0.9], B) 0.9 [0.8  
409 1.0], 0.2 [0.2, 0.3], C) 0.9 [0.7, 1.1], 0.6 [0.4, 0.9].

410

411

412

413 **References**

- 414 [1] Salje, H, Cummings, DA & Lessler, J. 2016 Estimating infectious disease transmission  
415 distances using the overall distribution of cases. *Epidemics* **17**, 10-18.
- 416 [2] Riley, S. 2007 Large-scale spatial-transmission models of infectious disease. *Science* **316**,  
417 1298-1301.
- 418 [3] Pepin, KM, Davis, AJ, Streicker, DG, Fischer, JW, VerCauteren, KC & Gilbert, AT. 2017  
419 Predicting spatial spread of rabies in skunk populations using surveillance data reported by the  
420 public. *PLoS neglected tropical diseases* **11**, e0005822.
- 421 [4] Ferguson, NM, Donnelly, CA & Anderson, RM. 2001 The foot-and-mouth epidemic in Great  
422 Britain: pattern of spread and impact of interventions. *Science* **292**, 1155-1160.
- 423 [5] Ferguson, NM, Donnelly, CA & Anderson, RM. 2001 Transmission intensity and impact of  
424 control policies on the foot and mouth epidemic in Great Britain. *Nature* **413**, 542-548.
- 425 [6] Keeling, MJ, Woolhouse, ME, Shaw, DJ, Matthews, L, Chase-Topping, M, Haydon, DT,  
426 Cornell, SJ, Kappey, J, Wilesmith, J & Grenfell, BT. 2001 Dynamics of the 2001 UK foot and  
427 mouth epidemic: stochastic dispersal in a heterogeneous landscape. *Science* **294**, 813-817.
- 428 [7] Woolhouse, M. 2011 How to make predictions about future infectious disease risks.  
429 *Philosophical Transactions of the Royal Society B: Biological Sciences* **366**, 2045-2054.
- 430 [8] Chipperfield, JD, Holland, EP, Dytham, C, Thomas, CD & Hovestadt, T. 2011 On the  
431 approximation of continuous dispersal kernels in discrete-space models. *Methods in Ecology and*  
432 *Evolution* **2**, 668-681.
- 433 [9] Shea, K, Tildesley, MJ, Runge, MC, Fonnesebeck, CJ & Ferrari, MJ. 2014 Adaptive  
434 management and the value of information: learning via intervention in epidemiology. *PLoS*  
435 *biology* **12**, e1001970.

- 436 [10] Sah, P, Mann, J & Bansal, S. 2018 Disease implications of animal social network structure:  
437 a synthesis across social systems. *Journal of Animal Ecology* **87**, 546-558.
- 438 [11] Dougherty, ER, Seidel, DP, Carlson, CJ, Spiegel, O & Getz, WM. 2018 Going through the  
439 motions: incorporating movement analyses into disease research. *Ecology letters* **21**, 588-604.
- 440 [12] Emch, M, Root, ED, Giebultowicz, S, Ali, M, Perez-Heydrich, C & Yunus, M. 2012  
441 Integration of spatial and social network analysis in disease transmission studies. *Annals of the*  
442 *Association of American Geographers* **102**, 1004-1015.
- 443 [13] Chapman, DA, Darby, AC, Da Silva, M, Upton, C, Radford, AD & Dixon, LK. 2011  
444 Genomic analysis of highly virulent Georgia 2007/1 isolate of African swine fever virus.  
445 *Emerging infectious diseases* **17**, 599.
- 446 [14] EFSA, EFS, Miteva, A, Papanikolaou, A, Gogin, A, Boklund, A, Bøtner, A, Linden, A,  
447 Viltrop, A, Schmidt, CG & Ivanciu, C. 2020 Epidemiological analyses of African swine fever in  
448 the European Union (November 2018 to October 2019). *EFSA Journal* **18**, e05996.
- 449 [15] Arias, M, Jurado, C, Gallardo, C, Fernández-Pinero, J & Sánchez-Vizcaíno, J. 2018 Gaps in  
450 African swine fever: analysis and priorities. *Transboundary and emerging diseases* **65**, 235-247.
- 451 [16] Pepin, KM, Golnar, A, Abdo, Z & Podgorski, T. 2020 Ecological drivers of African swine  
452 fever virus persistence in wild boar populations: insight for control. *Ecol Evol.* **10**, 2846–2859.  
453 (doi:10.1002/ece3.6100 ).
- 454 [17] Pepin, KM, Davis, AJ, Beasley, J, Boughton, R, Campbell, T, Cooper, SM, Gaston, W,  
455 Hartley, S, Kilgo, JC & Wisely, SM. 2016 Contact heterogeneities in feral swine: implications  
456 for disease management and future research. *Ecosphere* **7**, e01230.
- 457 [18] Podgórski, T, Apollonio, M & Keuling, O. 2018 Contact rates in wild boar populations:  
458 Implications for disease transmission. *The Journal of Wildlife Management* **82**, 1210-1218.



- 459 [19] Mazur-Panasiuk, N & Woźniakowski, G. 2019 The unique genetic variation within the  
460 O174L gene of Polish strains of African swine fever virus facilitates tracking virus origin.  
461 *Archives of virology* **164**, 1667-1672.
- 462 [20] Śmietanka, K, Woźniakowski, G, Kozak, E, Niemczuk, K, Frączyk, M, Bocian, Ł,  
463 Kowalczyk, A & Pejsak, Z. 2016 African swine fever epidemic, Poland, 2014–2015. *Emerging*  
464 *infectious diseases* **22**, 1201.
- 465 [21] Woźniakowski, G, Kozak, E, Kowalczyk, A, Łyjak, M, Pomorska-Mól, M, Niemczuk, K &  
466 Pejsak, Z. 2016 Current status of African swine fever virus in a population of wild boar in  
467 eastern Poland (2014-2015). *Archives of virology* **161**, 189-195.
- 468 [22] Rosell, C, Navas, F & Romero, S. 2012 Reproduction of wild boar in a cropland and coastal  
469 wetland area: implications for management. *Animal Biodiversity and Conservation* **35**, 209-217.
- 470 [23] Selva, N, Jędrzejewska, B, Jędrzejewski, W & Wajrak, A. 2005 Factors affecting carcass  
471 use by a guild of scavengers in European temperate woodland. *Canadian Journal of Zoology* **83**,  
472 1590-1601.
- 473 [24] Ježek, M, Štípek, K, Kušta, T, Červený, J & Vícha, J. 2011 Reproductive and morphometric  
474 characteristics of wild boar (*Sus scrofa*) in the Czech Republic. *Journal of forest science* **57**, 285-  
475 292.
- 476 [25] Bieber, C & Ruf, T. 2005 Population dynamics in wild boar *Sus scrofa*: ecology, elasticity  
477 of growth rate and implications for the management of pulsed resource consumers. *Journal of*  
478 *Applied Ecology* **42**, 1203-1213.
- 479 [26] Keeling, MJ & Rohani, P. 2008 *Modeling infectious diseases in humans and animals*. NJ,  
480 USA, Princeton University Press.

- 481 [27] Podgórski, T, Baś, G, Jędrzejewska, B, Sönnichsen, L, Śnieżko, S, Jędrzejewski, W &  
482 Okarma, H. 2013 Spatiotemporal behavioral plasticity of wild boar (*Sus scrofa*) under  
483 contrasting conditions of human pressure: primeval forest and metropolitan area. *Journal of*  
484 *Mammalogy* **94**, 109-119.
- 485 [28] Kay, SL, Fischer, JW, Monaghan, AJ, Beasley, JC, Boughton, R, Campbell, TA, Cooper,  
486 SM, Ditchkoff, SS, Hartley, SB & Kilgo, JC. 2017 Quantifying drivers of wild pig movement  
487 across multiple spatial and temporal scales. *Movement ecology* **5**, 14.
- 488 [29] White, LA, Forester, JD & Craft, ME. 2018 Dynamic, spatial models of parasite  
489 transmission in wildlife: Their structure, applications and remaining challenges. *journal of*  
490 *animal ecology* **87**, 559-580.
- 491 [30] White, LA, Forester, JD & Craft, ME. 2018 Disease outbreak thresholds emerge from  
492 interactions between movement behavior, landscape structure, and epidemiology. *Proceedings of*  
493 *the National Academy of Sciences* **115**, 7374-7379.
- 494 [31] Chenais, E, Depner, K, Guberti, V, Dietze, K, Viltrop, A & Ståhl, K. 2019 Epidemiological  
495 considerations on African swine fever in Europe 2014–2018. *Porcine health management* **5**, 1-6.
- 496 [32] EFSA, EFS, Depner, K, Gortazar, C, Guberti, V, Masiulis, M, More, S, Oļševskis, E,  
497 Thulke, H, Viltrop, A & Woźniakowski, G. 2017 Epidemiological analyses of African swine  
498 fever in the Baltic States and Poland: (Update September 2016–September 2017). *EFSA Journal*  
499 **15**, e05068.
- 500 [33] Iglesias, I, Muñoz, M, Montes, F, Perez, A, Gogin, A, Kolbasov, D & De la Torre, A. 2016  
501 Reproductive ratio for the local spread of African swine fever in wild boars in the Russian  
502 Federation. *Transboundary and emerging diseases* **63**, e237-e245.

- 503 [34] Podgórski, T, Scandura, M & Jędrzejewska, B. 2014 Next of kin next door—philopatry and  
504 socio-genetic population structure in wild boar. *Journal of Zoology* **294**, 190-197.
- 505 [35] Keeling, MJ. 1999 The effects of local spatial structure on epidemiological invasions.  
506 *Proceedings of the Royal Society of London. Series B: Biological Sciences* **266**, 859-867.
- 507 [36] Ames, GM, George, DB, Hampson, CP, Kanarek, AR, McBee, CD, Lockwood, DR, Achter,  
508 JD & Webb, CT. 2011 Using network properties to predict disease dynamics on human contact  
509 networks. *P Roy Soc B-Biol Sci* **278**, 3544-3550. (doi:10.1098/rspb.2011.0290).

510

511

512  
513  
514  
515  
516  
517  
518  
519  
520  
521  
522  
523  
524  
525  
526  
527  
528  
529  
530  
531  
532  
533  
534  
535  
536  
537  
538  
539  
540  
541  
542  
543

## Supplemental Material

### Social structure defines spatial transmission of African swine fever in wild boar

Kim M. Pepin<sup>1,\*</sup>, Andrew Golnar<sup>1</sup>, and Tomasz Podgórski<sup>2,3</sup>

4. National Wildlife Research Center, USDA, APHIS, Wildlife Services, 4101 Laporte Ave., Fort Collins, CO, 80526.
5. Mammal Research Institute, Polish Academy of Sciences, Stoczek 1, 17-230 Białowieża, Poland
6. Department of Game Management and Wildlife Biology, Faculty of Forestry and Wood Sciences, Czech University of Life Sciences, Kamýcká 129, 165 00 Praha 6, Czech Republic

\*Corresponding author: Kim Pepin, National Wildlife Research Center, United States Department of Agriculture, 4101 Laporte Ave., Fort Collins, CO, 80526;  
[kim.m.pepin@aphis.usda.gov](mailto:kim.m.pepin@aphis.usda.gov)

### Contents

- Table S1. Model selection, goodness of fit, and prior and posterior distributions.
- Figure S1. The demographic dynamics of African swine fever virus based on Model 1 output (Neighborhood).
- Figure S2. The demographic dynamics of African swine fever virus based on Model 2 output (exponential decay).
- Figure S3. The demographic dynamics of African swine fever virus based on Model 3 output (social and exponential).

| <b>Table S1</b>                                                                                                        | <b>Contact structure:</b>     | <b>Neighborhood</b>                               | <b>Exp. Decay (ED)</b>                 | <b>ED &amp; social structure</b>       |
|------------------------------------------------------------------------------------------------------------------------|-------------------------------|---------------------------------------------------|----------------------------------------|----------------------------------------|
|                                                                                                                        | $R^2$                         |                                                   |                                        |                                        |
| Monthly cases<br>(Median of the $R^2$ 's for 1000 individual time series $\pm$ 95% confidence interval)                | in sample<br>all              | $0.57 \pm 0.0059$<br>$0.48 \pm 0.0054$            | $0.51 \pm 0.0054$<br>$0.43 \pm 0.0046$ | $0.55 \pm 0.0060$<br>$0.47 \pm 0.0049$ |
| Monthly distance from border<br>(Median of the $R^2$ 's for 1000 individual time series $\pm$ 95% confidence interval) | in sample<br>all              | $0.28 \pm 0.018$<br>$0.19 \pm 0.016$              | $0.29 \pm 0.017$<br>$0.14 \pm 0.011$   | $0.31 \pm 0.018$<br>$0.28 \pm 0.011$   |
| Monthly cases<br>( $R^2$ of median values from 1000 points at each month)                                              | in sample<br>all              | 0.65<br>0.55                                      | 0.57<br>0.48                           | 0.63<br>0.53                           |
| Monthly distance from border<br>( $R^2$ of median values from 1000 points at each month)                               | in sample<br>all              | 0.53<br>0.49                                      | 0.49<br>0.38                           | 0.53<br>0.55                           |
|                                                                                                                        | Distance metrics <sup>a</sup> |                                                   |                                        |                                        |
| Median absolute error in monthly live cases $\pm$ 95% confidence interval                                              | in sample                     | $20 \pm 0.8$                                      | $20 \pm 0.9$                           | $20 \pm 0.5$                           |
| Median absolute error in monthly carcass cases $\pm$ 95% confidence interval                                           | in sample                     | $44 \pm 1.4$                                      | $43 \pm 2.8$                           | $44 \pm 0.8$                           |
| Median absolute error in monthly distance from border $\pm$ 95% confidence interval                                    | in sample                     | $109.5 \pm 5.0$                                   | $111.7 \pm 5.7$                        | $106.6 \pm 3.0$                        |
| Number of values in posterior distribution                                                                             |                               | $16 / 1,959,184 = 0.00082\%$                      | $7 / 1,959,184 = 0.00036\%$            | $53 / 1,959,184 = 0.0027\%$            |
|                                                                                                                        | Uniform Priors                | 95% credible intervals of posterior distributions |                                        |                                        |
| Probability of direct transmission given proximity ( $\beta_d$ )                                                       | [0.0001,1] <sup>b</sup>       | [0.0046, 1.0]                                     | [0.039, 0.15]                          | [0.0003, 0.18]                         |
| Probability of carcass-based transmission given proximity ( $\beta_c$ )                                                | [0.0001,1] <sup>b</sup>       | [0.0002, 0.53]                                    | [0.0038, 0.029]                        | [0.0001, 0.029]                        |
| Annual frequency of spillover from neighboring country ( $\beta_{0, \varphi}$ )                                        | [0,60] <sup>c</sup>           | [13, 59]                                          | [9, 60]                                | [6, 59]                                |
| Detection probability in hunted boar samples ( $\rho_h$ )                                                              | [0.0005,0.1] <sup>b</sup>     | [0.0006, 0.012]                                   | [0.0007, 0.021]                        | [0.0007, 0.017]                        |
| Detection probability in carcass samples ( $\rho_c$ )                                                                  | [0.0005,0.8] <sup>b</sup>     | [0.012, 0.080]                                    | [0.017, 0.045]                         | [0.014, 0.30]                          |
| Scaling parameter on seasonal trends in carcass persistence ( $\pi$ )                                                  | [0.1,1.5]                     | [0.58, 1.47]                                      | [0.77, 1.41]                           | [0.17, 1.47]                           |
| Scaling parameter on seasonal trends in conception probability ( $\theta$ )                                            | [0.5,6]                       | [0.93, 5.73]                                      | [1.31, 5.87]                           | [0.67, 5.88]                           |
| Constant contact radius ( $\zeta$ )                                                                                    | [0.5,5]                       | [1.09, 3.35]                                      | NA                                     | NA                                     |
| Rate parameter for decay of contact probability with distance ( $\alpha$ )                                             | [0.1,2.5]                     | NA                                                | [1.62, 2.49]                           | [0.05, 2.49]                           |
| Probability of direct transmission given contact is in the same group ( $\beta_{w,d}$ )                                | [0.01,1]                      | NA                                                | NA                                     | [0.077, 0.98]                          |
| Probability of carcass-based transmission given contact is in the same group ( $\beta_{w,c}$ )                         | [0.001,1]                     | NA                                                | NA                                     | [0.14, 0.97]                           |

<sup>a</sup>Median distance metrics  $\pm$  95% confidence intervals for 1000 simulations from the posterior distribution.

<sup>b</sup>These prior distributions were sampled on a natural log scale.

<sup>c</sup>0 indicates one introduction ever whereas values  $> 0$  indicate the number of introductions / year.

545

546

547

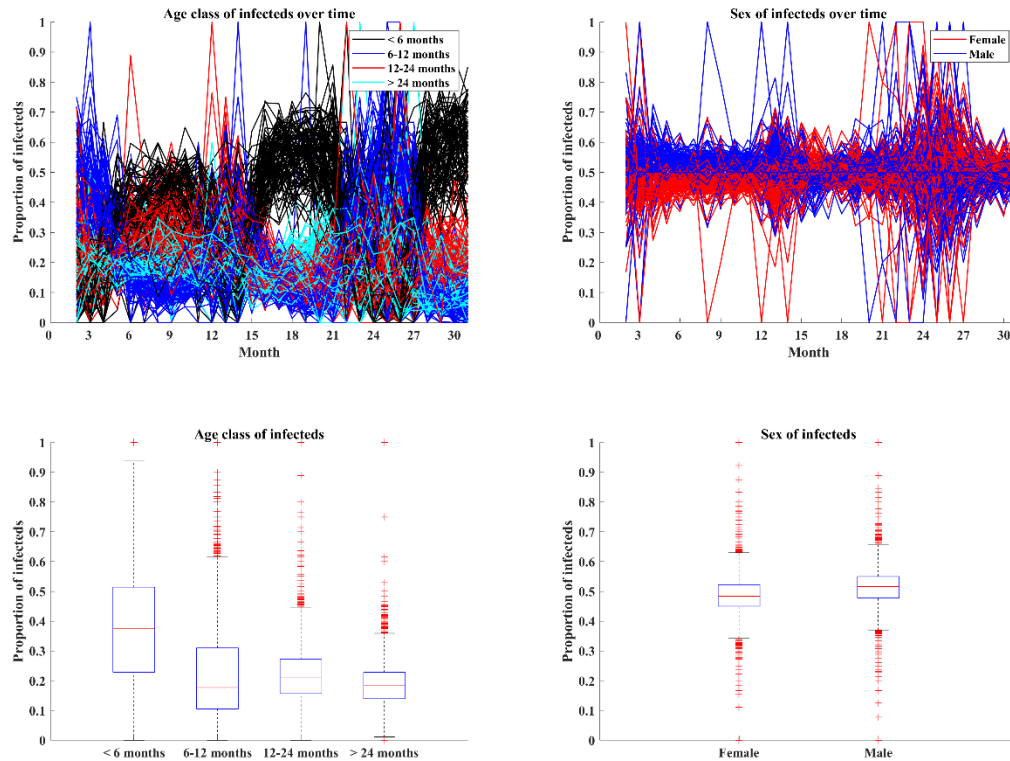

548

549 **Figure S1. The demographic dynamics of African swine fever virus based on Model 1**  
550 **output (Neighborhood).** Top plots show the frequency of infection in wild boar of different age  
551 classes (left) and sexes (right). Each line is a prediction from a separate sample of the posterior  
552 distribution of the fitted exponential decay & social structure model (100 trajectories in total).  
553 Bottom plots show the corresponding age class and sex distributions of infection over all time.

554

555

556

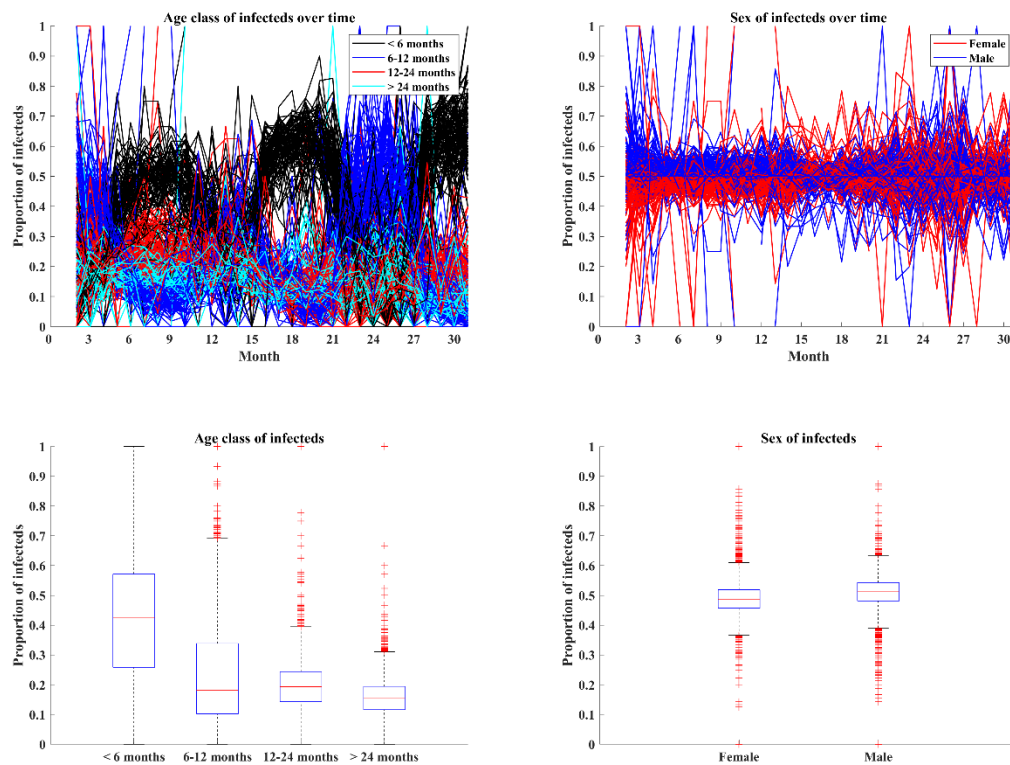

557  
558 **Figure S2. The demographic dynamics of African swine fever virus based on Model 2**  
559 **output (exponential decay).** Top plots show the frequency of infection in wild boar of different  
560 age classes (left) and sexes (right). Each line is a prediction from a separate sample of the  
561 posterior distribution of the fitted exponential decay & social structure model (100 trajectories in  
562 total). Bottom plots show the corresponding age class and sex distributions of infection over all  
563 time.

564

565

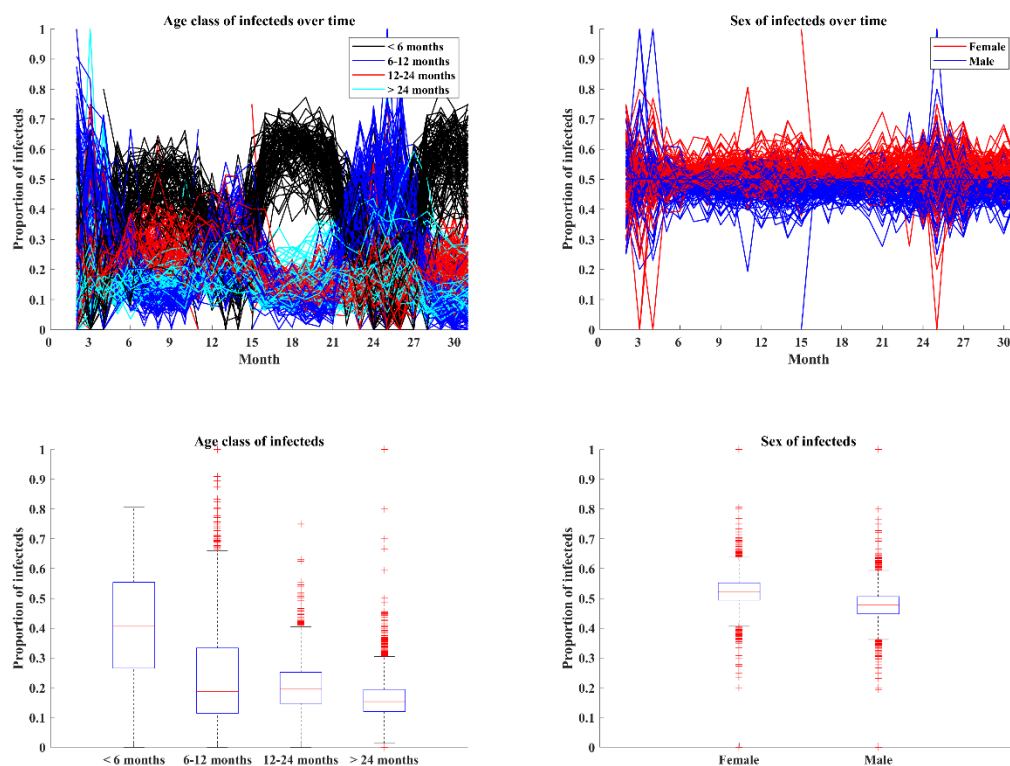

566

567 **Figure S3. The demographic dynamics of African swine fever virus based on Model 3**  
568 **output (social and exponential).** Top plots show the frequency of infection in wild boar of  
569 different age classes (left) and sexes (right). Each line is a prediction from a separate sample of  
570 the posterior distribution of the fitted exponential decay & social structure model (100  
571 trajectories in total). Bottom plots show the corresponding age class and sex distributions of  
572 infection over all time.

573

574
